# Supplementary material
Source: publisher site journal article supplement (https://www.spandidos-publications.com/474/downloadSupplementary)

# Appendix S1

## Materials and methods

*Ex vivo full-thickness skin organ cultures.* Skin specimens from healthy donors were obtained for *ex vivo* assays. Biopsies were cultured as follows: A hole was punched in a Transwell filter (pore size 1  $\mu\text{m}$ ; Beckton Dickinson Labware). The biopsy was inserted into the hole, and the filter containing the biopsy was placed in a 12-well culture plate (Beckton-Dickinson Labware) with Dulbecco's modified Eagle's medium (DMEM; Gibco) containing 10% fetal bovine serum (FBS; Gibco), 2 mM L-glutamine (Gibco) and antibiotics (100 IU/ml penicillin G, 100  $\mu\text{g/ml}$  streptomycin, Gibco). In this system, the epidermis faces upwards at the liquid-air interface whereas the dermis is suspended in the culture medium. The tissue was incubated at 37°C in a humidified atmosphere containing 5% CO<sub>2</sub>. Healthy skin biopsies were stimulated with recombinant human TNF- $\alpha$  protein (R&D Systems), at 20 ng/ml for 24 h.

*Normal human epidermal sheets and dermis.* Normal human epidermal sheets and dermis were isolated from healthy donors as previously described (1). Epidermal sheets were cultured in DMEM (Gibco) containing 10% fetal bovine serum (FBS; Gibco), 2 mM L-glutamine (Gibco) and antibiotics (100 IU/ml penicillin G, 100  $\mu\text{g/ml}$  streptomycin; Gibco) and stimulated with TNF- $\alpha$  (R&D Systems) at 20 ng/ml for 24 h.

*RNA extraction, cDNA synthesis and qRT-PCR.* *Ex vivo* full-thickness skin organ cultures, normal human epidermal sheets were snap-frozen in liquid nitrogen and stored at -70°C until RNA extraction.

## Reference

1. Kitano Y and Okada N: Separation of the epidermal sheet by dispase. Br J Dermatol 108: 555-560, 1983.

Figure S1. Gene expression of (A) Tyr and (B) BMP-4 in normal human epidermal sheet cultures treated with TNF- $\alpha$  (20 ng/ml) or untreated for 24 h. Gene expression of (C) Tyr and (D) BMP-4 in *ex vivo* healthy skin organ cultures treated with TNF- $\alpha$  (20 ng/ml) or untreated for 24 h. Data are presented as the mean  $\pm$  standard deviation. \*P<0.05 vs. matched controls. Tyr, tyrosinase; BMP, bone morphogenetic protein; TNF- $\alpha$ , tumor necrosis factor- $\alpha$ ; EP, epidermal sheet; OC, organ culture.

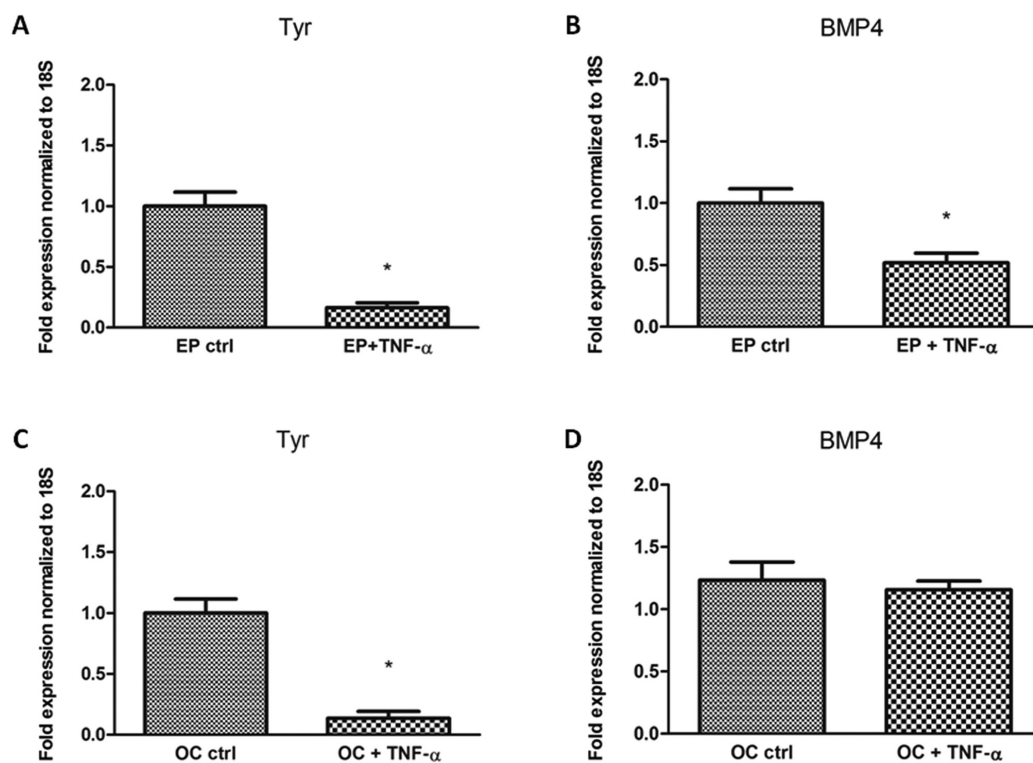

Supplement: Supplementary file 1 [file downloadSupplementary]
